# Supplementary material for: The micro-hotspots of cholera in Kano State, Nigeria, 2010-2019—analysis of patient characteristics, Spatio-temporal patterns and contextual determinants at the ward level
Source: bioRxiv or medRxiv preprint supplement (doi:10.1101/2021.08.20.21262313), 2021-08-23
Supplement: Supplementary file [file media-1.pdf]

Supplements.

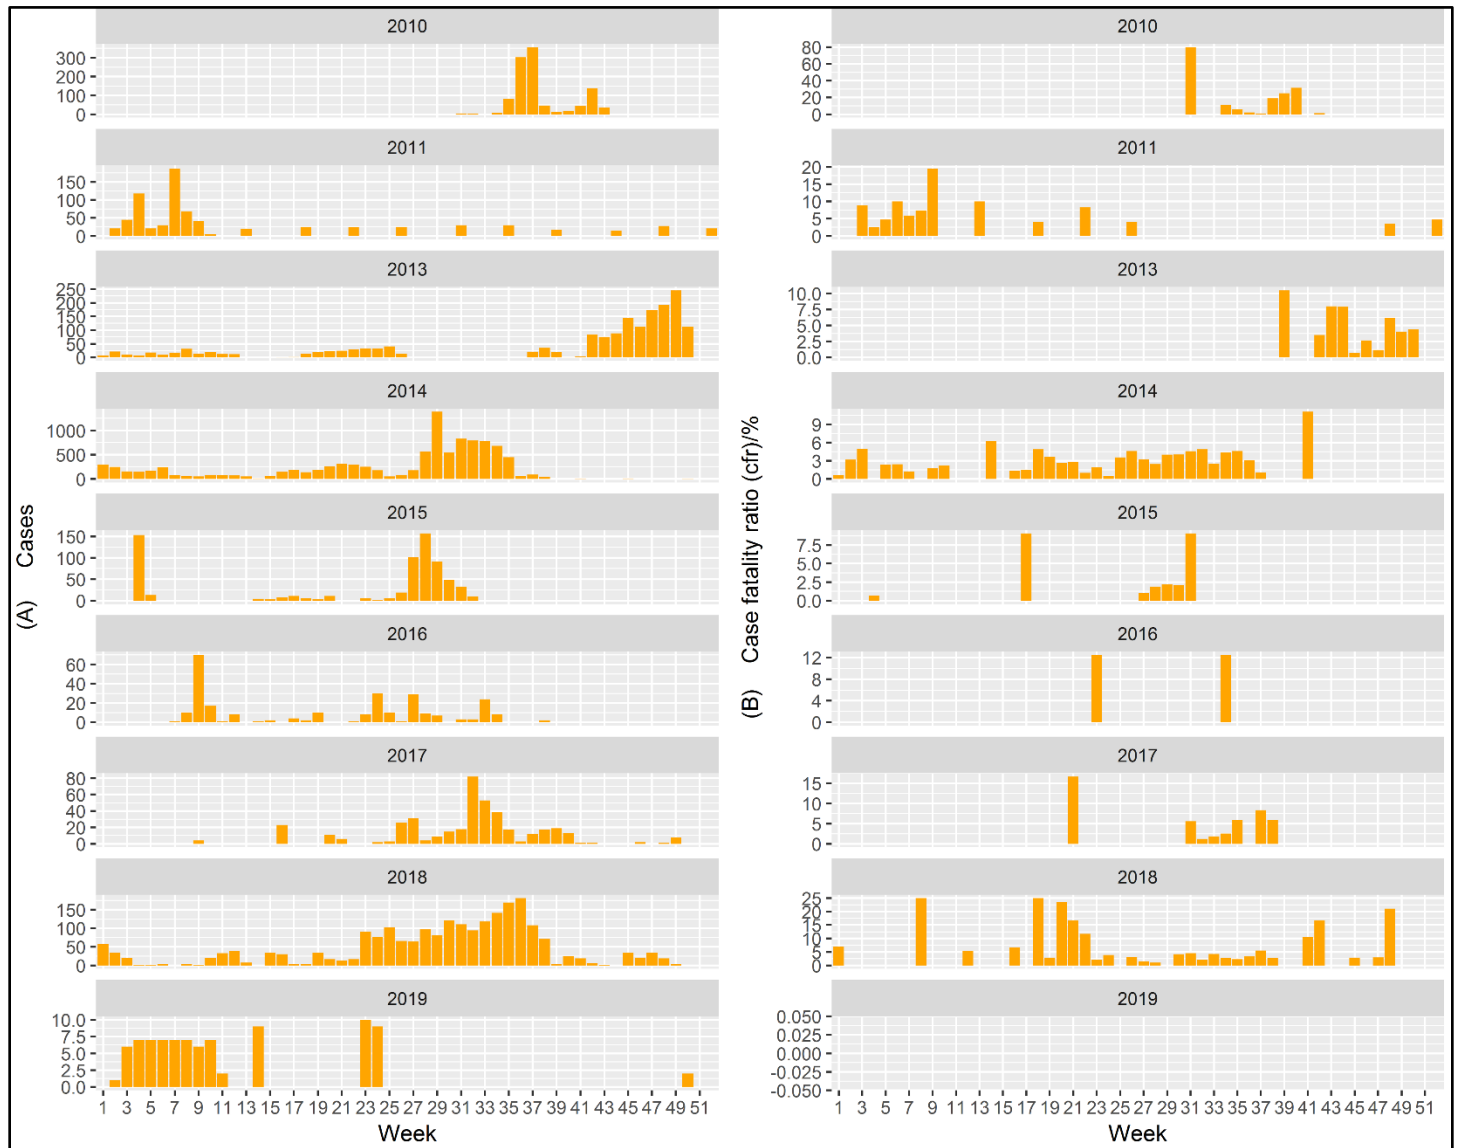

**S1 Fig. Weekly occurrence of cholera epidemics in Kano State, Nigeria, 2010-2019.** (A) Reported cases and (B) case fatality ratio (CFR) are shown on the Y-axis while the X-axis represent the epidemiological week of disease onset. Reported outbreaks in this time period started in week 31 of 2010 (A) with 80% case fatality ratio (CFR) (B) representing the worst CFR in the entire study period. (A) In subsequent years, the disease occurred with multiple waves and peaks through the year with 2014 reporting over a 1300 cases in week 27 alone. Weekly CFRs far exceeded below 1% as recommended by the WHO, although there were no fatalities in 2019 (B). No cholera epidemic was reported in 2012.

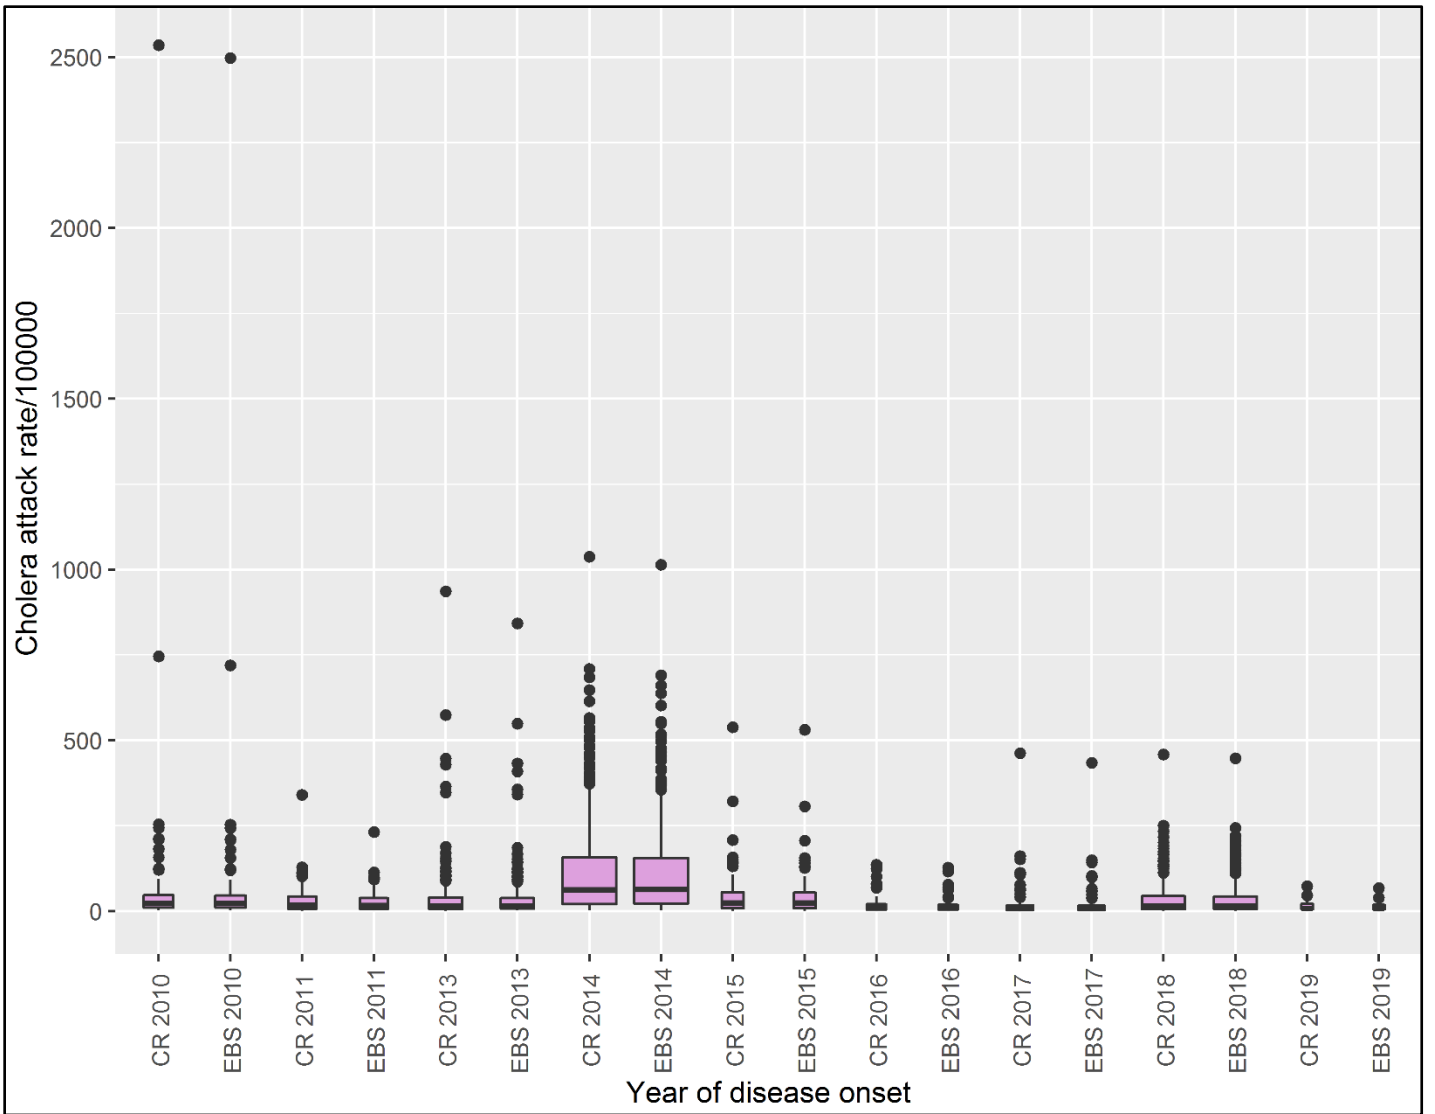

S2 Fig. Comparative boxplots for crude and Empirical Bayes Smoothed attack rates per 100,000 inhabitants. Plot shows minor differences between unsmoothed crude rates (CR) and Smoothed (EBS) rates; and thus, CR rates were used in analysis.

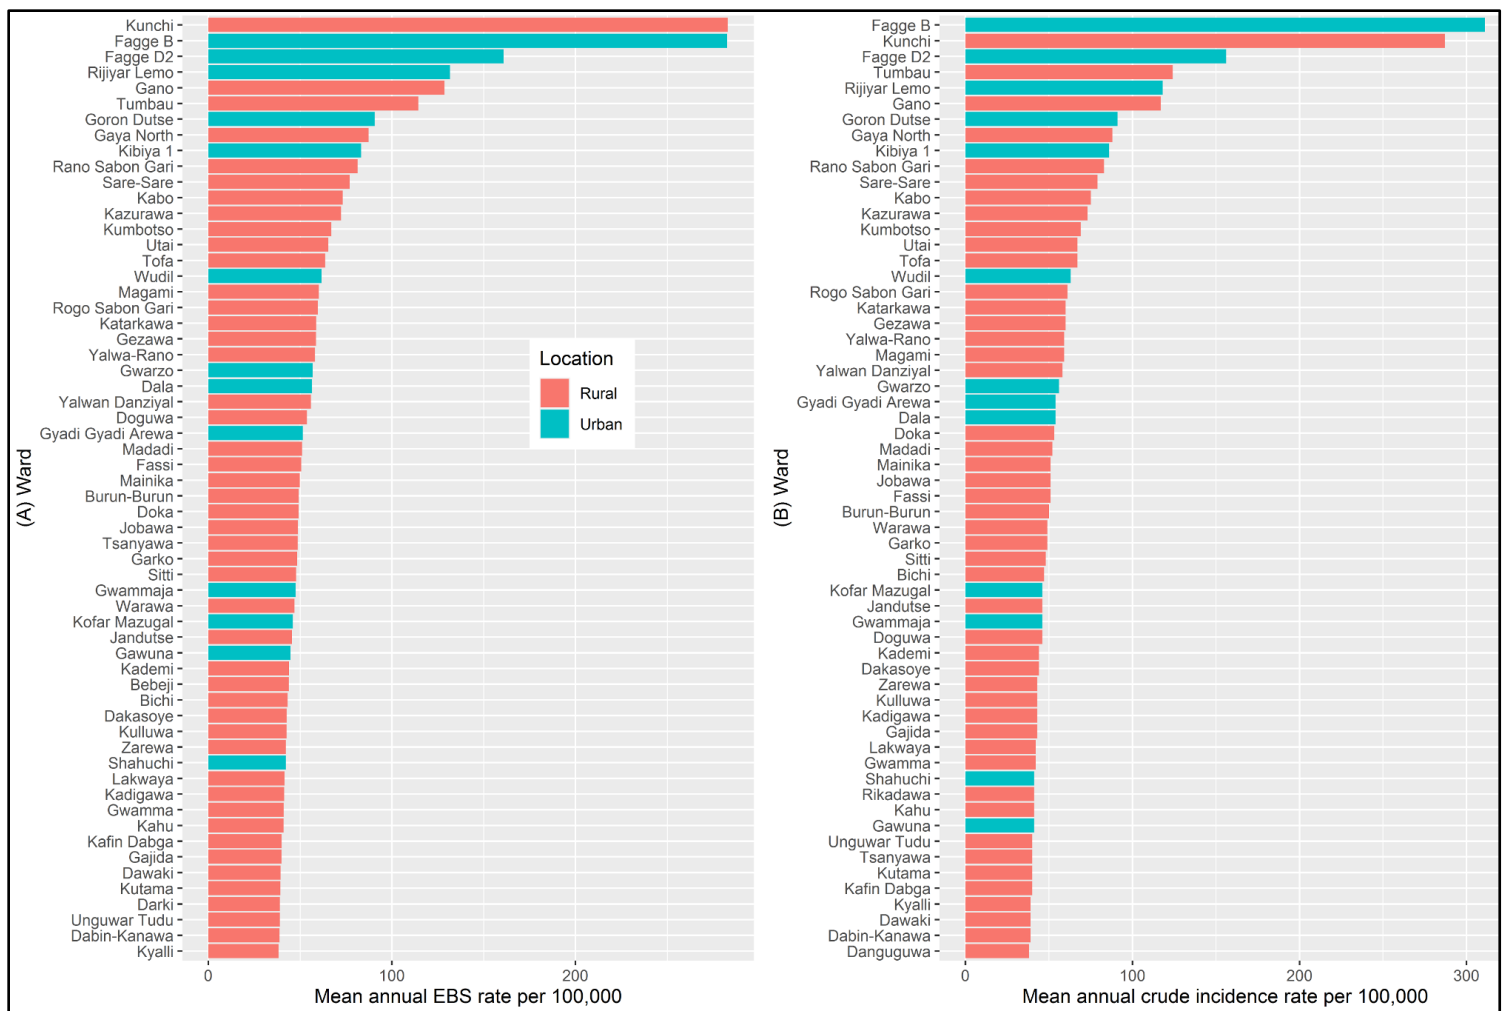

**S3 Fig. Distribution of mean annual EBS rate and mean annual crude incidence rate of cholera by urban and rural wards, 2010-2019.** Figure show (A) mean annual Empirical Bayes Smoothed (EBS) rates and (B) mean annual crude incidence rates per 100,000 for the top ranked 60 wards with heavy burden of cholera. (A) The top ranked ward with highest cholera rate is a rural ward (Kunchi) while (B) the top ranked ward with highest cholera burden is an urban ward (Fagge B). Although there are differences between the EBS and crude rates, the same wards are represented; from top to bottom, only the respective positions of the wards on the graph changes.

**S1 Table. Wards with the type of micro-hotspots by mean annual incidence rate and proportion of years with reported cholera cases (GTFCC method)**

| Type (T) of micro-hotspot | Ward            | Location | Population | Mean Annual Incidence/100,000 <sup>±</sup> | Proportion of years with reported cholera (%) |
|---------------------------|-----------------|----------|------------|--------------------------------------------|-----------------------------------------------|
| T1                        | Fagge B         | Urban    | 6525       | 310.68                                     | 10.04                                         |
| T1                        | Fagge D2        | Urban    | 15539      | 156.03                                     | 10.47                                         |
| T1                        | Rijiyar Lemo    | Urban    | 32200      | 117.56                                     | 14.10                                         |
| T1                        | Gano            | Rural    | 38513      | 117.07                                     | 11.54                                         |
| T1                        | Goron Dutse     | Urban    | 17259      | 90.51                                      | 9.40                                          |
| T1                        | Gaya North      | Rural    | 46515      | 88.38                                      | 7.05                                          |
| T1                        | Kibiya 1        | Rural    | 15114      | 86.36                                      | 2.56                                          |
| T1                        | Rano Sabon Gari | Rural    | 27324      | 82.99                                      | 3.21                                          |
| T1                        | Kabo            | Rural    | 27393      | 75.11                                      | 4.70                                          |
| T1                        | Kumbotso        | Urban    | 15060      | 68.68                                      | 7.05                                          |
| T1                        | Tofa            | Rural    | 19795      | 67.10                                      | 7.05                                          |
| T1                        | Utai            | Rural    | 21892      | 67.02                                      | 3.42                                          |

|    |                   |       |       |       |       |
|----|-------------------|-------|-------|-------|-------|
| T1 | Wudil             | Rural | 42977 | 62.52 | 6.84  |
| T1 | Rogo Sabon Gari   | Rural | 28096 | 60.57 | 4.49  |
| T1 | Gezawa            | Rural | 32091 | 59.69 | 7.05  |
| T1 | Gwarzo            | Rural | 22648 | 56.40 | 6.20  |
| T1 | Dala              | Urban | 41129 | 53.96 | 12.61 |
| T1 | Gyadi Gyadi Arewa | Urban | 8307  | 53.61 | 4.27  |
| T1 | Doka              | Rural | 10652 | 53.18 | 3.21  |
| T1 | Madadi            | Rural | 28477 | 51.93 | 3.42  |
| T1 | Mainika           | Rural | 18458 | 51.31 | 4.06  |
| T1 | Warawa            | Rural | 9087  | 49.39 | 3.21  |
| T1 | Garko             | Rural | 33532 | 48.98 | 3.85  |
| T1 | Bichi             | Rural | 73274 | 47.17 | 8.55  |
| T1 | Kofar Mazugal     | Urban | 26356 | 46.10 | 9.83  |
| T1 | Jandutse          | Rural | 41370 | 45.99 | 3.42  |
| T1 | Doguwa            | Rural | 22303 | 45.56 | 3.85  |
| T1 | Gwammaja          | Urban | 54069 | 45.55 | 12.61 |
| T1 | Kulluwa           | Rural | 21976 | 43.40 | 3.21  |
| T1 | Gajida            | Rural | 5569  | 43.36 | 2.56  |
| T1 | Lakwaya           | Rural | 50658 | 41.80 | 5.34  |
| T1 | Gawuna            | Urban | 31306 | 41.45 | 7.26  |
| T1 | Shahuchi          | Urban | 40050 | 40.82 | 11.32 |
| T1 | Kafin Dabga       | Rural | 24184 | 40.42 | 3.21  |
| T1 | Tsanyawa          | Rural | 25466 | 40.22 | 4.06  |
| T1 | Kutama            | Rural | 30525 | 39.95 | 4.06  |
| T1 | Unguwar Tudu      | Rural | 25688 | 39.56 | 4.06  |
| T1 | Dawaki            | Rural | 35337 | 39.08 | 6.84  |
| T1 | Danguguwa         | Rural | 25931 | 38.26 | 2.99  |
| T1 | Rimin Gado        | Rural | 20296 | 38.03 | 4.27  |
| T1 | Yanoko            | Rural | 13048 | 37.48 | 3.42  |
| T1 | Sabon Gari-Wudil  | Rural | 23346 | 36.01 | 4.91  |
| T1 | Tsakuwa           | Rural | 29843 | 34.93 | 5.13  |
| T1 | Bebeji            | Rural | 36646 | 34.05 | 3.85  |
| T1 | Ungogo            | Urban | 37929 | 33.52 | 7.05  |
| T1 | Fagge A           | Urban | 21523 | 33.47 | 3.85  |
| T1 | Bunkure           | Rural | 35252 | 33.31 | 2.56  |
| T1 | Gwale             | Urban | 34950 | 33.22 | 9.19  |
| T1 | Rijiyar Zaki      | Rural | 40520 | 32.89 | 10.26 |
| T1 | Tsohon Gari       | Rural | 29938 | 32.73 | 2.99  |
| T1 | Getso             | Rural | 36029 | 32.17 | 3.63  |
| T1 | Tarauni           | Urban | 12770 | 31.84 | 4.27  |
| T1 | Darki             | Rural | 33384 | 30.83 | 3.21  |
| T1 | Dandago           | Urban | 26536 | 29.53 | 7.26  |
| T1 | Zaitawa           | Urban | 40975 | 28.61 | 9.83  |
| T1 | Sabon Gari        | Rural | 30802 | 28.40 | 4.06  |
| T1 | Panshekara        | Urban | 35135 | 28.31 | 6.20  |
| T1 | Rimin Dako        | Rural | 24873 | 28.09 | 2.56  |
| T1 | Bagwai            | Rural | 27981 | 28.01 | 3.63  |
| T1 | Kwajale           | Rural | 20182 | 27.80 | 3.63  |
| T1 | She She           | Urban | 22473 | 27.69 | 5.13  |
| T1 | Yalwa-Dala        | Urban | 23474 | 27.49 | 4.91  |

|    |                 |       |        |       |       |
|----|-----------------|-------|--------|-------|-------|
| T1 | Kubaraci        | Rural | 26001  | 27.21 | 2.99  |
| T1 | Yakasai         | Urban | 36857  | 26.64 | 7.91  |
| T1 | Kiru            | Rural | 53125  | 26.60 | 3.63  |
| T1 | Jakara          | Urban | 22634  | 26.34 | 4.70  |
| T1 | Takai           | Rural | 45279  | 26.05 | 3.85  |
| T1 | Sabon Gari West | Urban | 42804  | 25.81 | 5.77  |
| T1 | Shuwaki         | Rural | 25746  | 25.44 | 3.42  |
| T1 | Danbare         | Urban | 25292  | 25.41 | 3.85  |
| T1 | Dan Maliki      | Urban | 106135 | 24.16 | 9.19  |
| T1 | Bachirawa       | Urban | 73206  | 23.95 | 8.76  |
| T1 | Dakata          | Urban | 49321  | 23.26 | 8.55  |
| T1 | Mandawari       | Urban | 14175  | 22.06 | 3.42  |
| T1 | Lambu           | Rural | 18732  | 21.97 | 2.78  |
| T1 | Gayawa          | Rural | 50228  | 21.09 | 3.85  |
| T1 | Jalli           | Rural | 21241  | 21.09 | 2.56  |
| T1 | Beli            | Rural | 25641  | 20.49 | 2.78  |
| T1 | Bargoni         | Rural | 34869  | 20.45 | 3.63  |
| T1 | Gyaranya        | Urban | 17198  | 19.98 | 3.21  |
| T1 | Tanburawa       | Rural | 33930  | 19.83 | 2.78  |
| T1 | Sani Mai Nagge  | Urban | 41337  | 19.77 | 6.84  |
| T1 | Galadanchi      | Urban | 24944  | 19.72 | 4.49  |
| T1 | Naibawa         | Urban | 76213  | 19.65 | 6.62  |
| T1 | Yaryasa         | Rural | 33669  | 19.65 | 2.56  |
| T1 | Chedi           | Urban | 15050  | 19.40 | 2.78  |
| T1 | Dawakiji        | Rural | 34966  | 19.04 | 3.21  |
| T1 | Dan Agundi      | Urban | 18859  | 18.87 | 3.63  |
| T1 | Madobi          | Rural | 29235  | 18.64 | 4.49  |
| T1 | Ketawa          | Rural | 42522  | 18.20 | 3.63  |
| T1 | Tudun Fulani    | Urban | 87983  | 18.08 | 6.20  |
| T1 | Sharada         | Urban | 97279  | 18.03 | 10.68 |
| T1 | Ajingi          | Rural | 25862  | 17.58 | 3.63  |
| T1 | Kara            | Rural | 32141  | 17.21 | 3.21  |
| T1 | Kaura Goje      | Urban | 101993 | 16.87 | 10.26 |
| T1 | Rogo Ruma       | Rural | 32896  | 15.85 | 2.56  |
| T1 | Minjibir        | Rural | 31563  | 15.71 | 2.78  |
| T1 | Kawaji          | Urban | 119986 | 15.54 | 11.32 |
| T1 | Adakawa         | Urban | 27219  | 15.23 | 4.06  |
| T1 | Gandu Albasa    | Urban | 74484  | 14.55 | 5.34  |
| T1 | Kantudu         | Urban | 26646  | 13.12 | 2.78  |
| T1 | Garun Gawa      | Rural | 26221  | 13.10 | 4.27  |
| T1 | Kan Karofi      | Urban | 38874  | 12.51 | 4.91  |
| T1 | Dorayi          | Urban | 230272 | 12.30 | 14.32 |
| T1 | Jita            | Rural | 25798  | 12.09 | 2.56  |
| T1 | Darmanawa       | Urban | 67397  | 12.01 | 7.05  |
| T1 | Tudun Murtala   | Urban | 83078  | 11.62 | 7.69  |
| T1 | Zango-III       | Urban | 64141  | 11.51 | 7.26  |
| T1 | Kausani         | Rural | 32945  | 11.19 | 2.99  |
| T1 | Kofar Ruwa      | Urban | 101663 | 11.12 | 8.76  |
| T1 | Dankaza         | Rural | 29476  | 10.88 | 3.21  |
| T1 | Gobirawa        | Urban | 222097 | 10.71 | 11.11 |

|                 |                 |       |                  |        |      |
|-----------------|-----------------|-------|------------------|--------|------|
| T1              | Hotoro South    | Urban | 59253            | 10.62  | 5.13 |
| T1              | Gabasawa        | Rural | 44889            | 10.48  | 2.78 |
| T1              | Gwangwan        | Rural | 31455            | 10.44  | 2.99 |
| <b>T1 Total</b> | <b>115</b>      |       | <b>4,505,370</b> |        |      |
| T2              | Kunchi          | Rural | 16152            | 287.17 | 1.50 |
| T2              | Tumbau          | Rural | 25985            | 123.76 | 2.35 |
| T2              | Sare-Sare       | Rural | 21673            | 78.77  | 1.07 |
| T2              | Kazurawa        | Rural | 35668            | 73.13  | 1.71 |
| T2              | Katarkawa       | Rural | 13218            | 59.61  | 0.85 |
| T2              | Yalwa-Rano      | Rural | 24823            | 59.19  | 1.92 |
| T2              | Magami          | Rural | 56336            | 59.18  | 1.50 |
| T2              | Yalwan Danziyal | Rural | 16232            | 57.69  | 1.71 |
| T2              | Jobawa          | Rural | 15728            | 51.36  | 0.64 |
| T2              | Fassi           | Rural | 35407            | 51.19  | 0.85 |
| T2              | Burun-Burun     | Rural | 29759            | 49.87  | 2.14 |
| T2              | Sitti           | Rural | 44455            | 48.25  | 2.35 |
| T2              | Kademi          | Rural | 38155            | 44.44  | 1.28 |
| T2              | Dakasoye        | Rural | 17303            | 44.11  | 1.92 |
| T2              | Kadigawa        | Rural | 10735            | 42.82  | 0.64 |
| T2              | Zarewa          | Rural | 28438            | 42.80  | 1.50 |
| T2              | Gwamma          | Rural | 24776            | 41.76  | 1.92 |
| T2              | Kahu            | Rural | 26805            | 41.46  | 1.07 |
| T2              | Rikadawa        | Rural | 19416            | 41.00  | 1.92 |
| T2              | Dabin-Kanawa    | Rural | 24778            | 39.22  | 1.07 |
| T2              | Kyalli          | Rural | 35928            | 38.90  | 1.71 |
| T2              | Gurjiya-I       | Rural | 18573            | 35.27  | 1.28 |
| T2              | Yako            | Rural | 22236            | 35.25  | 1.07 |
| T2              | Mesar Tudu      | Rural | 27990            | 35.19  | 1.71 |
| T2              | Zurgu           | Rural | 22851            | 34.63  | 2.14 |
| T2              | Yammedi         | Rural | 20273            | 34.34  | 1.92 |
| T2              | Durba           | Rural | 13432            | 33.21  | 0.85 |
| T2              | Yalwa Karama    | Rural | 5348             | 32.97  | 2.35 |
| T2              | Jili            | Rural | 12182            | 30.77  | 1.50 |
| T2              | Dindere         | Rural | 5710             | 30.08  | 2.35 |
| T2              | Wudilawa        | Rural | 15880            | 29.39  | 1.50 |
| T2              | Sumaila         | Rural | 35188            | 29.14  | 2.14 |
| T2              | Kumurya         | Rural | 36284            | 28.79  | 1.92 |
| T2              | Mekiya          | Rural | 34634            | 27.86  | 0.64 |
| T2              | Yada Kwari      | Rural | 20308            | 27.81  | 0.21 |
| T2              | Lausu           | Rural | 23904            | 26.18  | 2.14 |
| T2              | Magajin Gari    | Rural | 10462            | 25.67  | 1.92 |
| T2              | Shanono         | Rural | 33914            | 25.02  | 2.35 |
| T2              | Sabon Birni     | Rural | 21624            | 24.90  | 2.35 |
| T2              | Kadawa          | Rural | 17158            | 24.87  | 0.85 |
| T2              | Madachi         | Rural | 17583            | 24.46  | 1.92 |
| T2              | Achika          | Rural | 13973            | 24.44  | 2.35 |
| T2              | Langel          | Rural | 10551            | 23.87  | 1.71 |
| T2              | Gani            | Rural | 37915            | 23.57  | 0.64 |
| T2              | Tsaure          | Rural | 29476            | 23.50  | 0.85 |

|    |                  |       |       |       |      |
|----|------------------|-------|-------|-------|------|
| T2 | Dal              | Rural | 34797 | 23.40 | 0.85 |
| T2 | Unguar Gai       | Rural | 23092 | 23.25 | 0.64 |
| T2 | Duja             | Rural | 10357 | 22.82 | 0.64 |
| T2 | Kafin Malamai    | Rural | 26812 | 21.55 | 1.50 |
| T2 | Kogo             | Rural | 21341 | 21.29 | 1.92 |
| T2 | Dadin Kowa       | Rural | 36464 | 20.74 | 2.14 |
| T2 | Burji            | Rural | 10180 | 20.64 | 1.07 |
| T2 | Kwamarawa        | Rural | 22976 | 20.53 | 1.28 |
| T2 | Gulu             | Rural | 18687 | 20.29 | 1.92 |
| T2 | Yan Dala         | Rural | 8547  | 20.03 | 1.07 |
| T2 | Chirin           | Rural | 24971 | 19.98 | 1.28 |
| T2 | Zinyau           | Rural | 13007 | 19.71 | 1.71 |
| T2 | Karfi            | Rural | 19765 | 19.32 | 1.07 |
| T2 | Albasu Central   | Rural | 33373 | 18.89 | 1.71 |
| T2 | Cinkoso          | Rural | 6055  | 18.71 | 1.50 |
| T2 | Saya-Saya        | Rural | 33325 | 18.54 | 1.71 |
| T2 | Imawa            | Rural | 11918 | 17.94 | 0.43 |
| T2 | Dalawa           | Rural | 27934 | 17.87 | 1.07 |
| T2 | Barkum           | Rural | 24521 | 17.86 | 2.14 |
| T2 | Kunkurawa        | Rural | 25956 | 17.71 | 0.64 |
| T2 | Gurjiya-III      | Rural | 24342 | 17.27 | 1.07 |
| T2 | Rumo             | Rural | 16793 | 17.20 | 0.43 |
| T2 | Farun Ruwa       | Rural | 40563 | 17.11 | 0.64 |
| T2 | Rahama           | Rural | 23350 | 17.09 | 1.50 |
| T2 | Saidawa          | Rural | 35860 | 17.01 | 0.64 |
| T2 | Daho             | Rural | 24652 | 16.92 | 1.07 |
| T2 | Fanda            | Rural | 32148 | 16.34 | 0.85 |
| T2 | Shagogo          | Rural | 32505 | 16.34 | 1.71 |
| T2 | Yankatsari       | Rural | 10589 | 16.26 | 1.92 |
| T2 | Fammar           | Rural | 22711 | 16.19 | 0.43 |
| T2 | Danzabuwa        | Rural | 53451 | 15.91 | 1.50 |
| T2 | Unguar Tsohuwa   | Rural | 16645 | 15.78 | 1.28 |
| T2 | Gaya South       | Rural | 40232 | 15.60 | 2.35 |
| T2 | Janguza          | Rural | 11936 | 15.45 | 2.14 |
| T2 | Saji             | Rural | 21225 | 15.24 | 1.71 |
| T2 | Diso             | Urban | 9842  | 14.83 | 1.92 |
| T2 | Fagwalawa        | Rural | 31663 | 14.74 | 1.28 |
| T2 | Kosawa           | Rural | 24617 | 14.74 | 0.85 |
| T2 | Gafasa           | Rural | 25891 | 14.71 | 0.64 |
| T2 | Unguar Rimi-Tofa | Rural | 12554 | 13.84 | 1.28 |
| T2 | Kuki             | Rural | 18341 | 13.78 | 1.28 |
| T2 | Karfi-Kura       | Rural | 30723 | 13.74 | 1.71 |
| T2 | Zainabi          | Rural | 15045 | 13.56 | 0.85 |
| T2 | Tagwaye          | Rural | 21696 | 13.30 | 1.50 |
| T2 | Balare           | Rural | 24819 | 13.19 | 0.85 |
| T2 | Nariya           | Rural | 21249 | 12.98 | 1.50 |
| T2 | Yarimawa         | Rural | 9178  | 12.84 | 1.71 |
| T2 | Jauben Kudu      | Rural | 7153  | 12.32 | 1.28 |
| T2 | Kauran Mata      | Rural | 13039 | 12.30 | 1.71 |
| T2 | Dosan            | Rural | 25289 | 11.23 | 1.50 |

|                 |                       |       |                  |       |      |
|-----------------|-----------------------|-------|------------------|-------|------|
| T2              | Gafan                 | Rural | 27261            | 11.05 | 1.28 |
| T2              | Yankamaye             | Rural | 29327            | 11.02 | 1.07 |
| T2              | Gora                  | Rural | 27969            | 10.80 | 1.92 |
| T2              | Danlasan              | Rural | 6123             | 10.73 | 0.43 |
| T2              | Tudun Kaya            | Rural | 27046            | 10.71 | 1.28 |
| T2              | Yargaya               | Rural | 19496            | 10.61 | 0.85 |
| T2              | Zuwo                  | Rural | 22652            | 10.51 | 1.07 |
| T2              | Indabo                | Rural | 15059            | 10.46 | 1.71 |
| T2              | Butu-Butu             | Rural | 16450            | 10.18 | 1.28 |
| T2              | Rano Dawaki           | Rural | 20510            | 10.00 | 1.07 |
| <b>T2 Total</b> | <b>105</b>            |       | <b>2,413,291</b> |       |      |
| T3              | Unguwa Uku Cikin Gari | Urban | 35175            | 9.96  | 2.56 |
| T3              | Bakin Ruwa            | Urban | 37500            | 9.94  | 4.49 |
| T3              | Kadawa-Ungogo         | Urban | 56668            | 9.62  | 3.42 |
| T3              | Tudun Wazurchi        | Urban | 52243            | 9.40  | 4.49 |
| T3              | Jogana                | Rural | 52963            | 9.19  | 4.27 |
| T3              | Madigawa              | Urban | 21297            | 8.78  | 2.99 |
| T3              | Gwagwarwa             | Urban | 56368            | 8.68  | 3.21 |
| T3              | Fanisau               | Rural | 27616            | 8.67  | 2.56 |
| T3              | Zango-IV              | Urban | 112963           | 8.56  | 5.98 |
| T3              | Zoza                  | Rural | 44385            | 8.50  | 2.99 |
| T3              | Kabuga                | Urban | 135672           | 8.17  | 9.19 |
| T3              | Dagumawa              | Rural | 39250            | 8.00  | 3.21 |
| T3              | Mariri                | Urban | 49866            | 7.92  | 3.21 |
| T3              | Unguwa Uku Kauyen Alu | Urban | 64103            | 7.26  | 4.27 |
| T3              | Kwachiri              | Urban | 94577            | 6.47  | 3.85 |
| T3              | Zango-I               | Rural | 48551            | 5.93  | 2.78 |
| T3              | Hotoro                | Urban | 58150            | 5.68  | 2.78 |
| T3              | Giginyu               | Urban | 163524           | 5.59  | 6.84 |
| T3              | Gama                  | Urban | 79001            | 5.05  | 4.06 |
| T3              | Badume                | Rural | 56171            | 4.80  | 2.56 |
| T3              | Rangaza               | Rural | 40089            | 4.66  | 2.78 |
| T3              | Hotoro North          | Urban | 142720           | 4.46  | 5.13 |
| T3              | Dawanau               | Rural | 101627           | 2.26  | 2.78 |
| <b>T3 Total</b> | <b>23</b>             |       | <b>1,570,479</b> |       |      |
| T4              | Dogon Kawo            | Rural | 17125            | 9.97  | 0.43 |
| T4              | Dawaki West           | Rural | 18744            | 9.92  | 1.92 |
| T4              | Rimi                  | Rural | 33877            | 9.69  | 0.21 |
| T4              | Falgore Doguwa        | Rural | 23702            | 9.43  | 1.71 |
| T4              | Tumfafi               | Rural | 57525            | 9.37  | 1.50 |
| T4              | Dawaki East           | Rural | 21121            | 9.33  | 0.21 |
| T4              | Dalili                | Rural | 18393            | 9.28  | 1.28 |
| T4              | Jama'A                | Rural | 14354            | 9.26  | 1.28 |
| T4              | Tanagar               | Rural | 26368            | 9.21  | 0.85 |
| T4              | Karefa                | Rural | 25742            | 9.12  | 1.07 |
| T4              | Kwas                  | Rural | 18859            | 9.05  | 0.64 |
| T4              | Zango-II              | Rural | 14828            | 8.64  | 1.50 |
| T4              | Amarawa               | Rural | 6311             | 8.61  | 0.64 |
| T4              | Yan Barau             | Rural | 10892            | 8.44  | 1.28 |
| T4              | Goron Maje            | Rural | 18340            | 8.19  | 0.43 |



|    |                   |       |       |      |      |
|----|-------------------|-------|-------|------|------|
| T4 | Tudun Wada        | Urban | 23443 | 8.08 | 1.71 |
| T4 | Gawo              | Rural | 30519 | 8.06 | 2.35 |
| T4 | Sararin Gezawa    | Rural | 24744 | 7.96 | 1.71 |
| T4 | Maraku            | Rural | 34386 | 7.82 | 1.07 |
| T4 | Kwankwaso         | Rural | 27025 | 7.71 | 2.35 |
| T4 | Danbagina         | Rural | 25664 | 7.67 | 0.43 |
| T4 | Daura             | Rural | 23781 | 7.50 | 0.64 |
| T4 | Bauda             | Rural | 20891 | 7.46 | 1.07 |
| T4 | Daurawa           | Urban | 15800 | 7.46 | 1.50 |
| T4 | Waire             | Rural | 25261 | 7.43 | 1.07 |
| T4 | Turawa            | Rural | 21952 | 7.36 | 1.50 |
| T4 | Yalwa-Kiru        | Rural | 48008 | 7.25 | 1.07 |
| T4 | Rurum Tsohon Gari | Rural | 21589 | 7.07 | 1.07 |
| T4 | Garun Malam       | Rural | 15330 | 6.91 | 1.07 |
| T4 | Ginsawa           | Rural | 5511  | 6.91 | 0.64 |
| T4 | Riruwai           | Rural | 23051 | 6.84 | 1.07 |
| T4 | Faragai           | Rural | 29036 | 6.78 | 1.07 |
| T4 | Kafin Agur        | Rural | 9952  | 6.69 | 1.07 |
| T4 | Dawakin Gulu      | Rural | 5967  | 6.60 | 0.43 |
| T4 | Gadanya           | Rural | 24723 | 6.37 | 0.43 |
| T4 | Fulatan           | Rural | 30147 | 5.99 | 1.07 |
| T4 | Garin Dau         | Rural | 17685 | 5.94 | 1.07 |
| T4 | Zogarawa          | Rural | 10913 | 5.91 | 1.07 |
| T4 | Shamakawa         | Rural | 11706 | 5.89 | 0.64 |
| T4 | Jido              | Rural | 15637 | 5.88 | 0.85 |
| T4 | Gammo             | Rural | 20742 | 5.87 | 0.64 |
| T4 | Rurum Sabon Gari  | Rural | 28995 | 5.86 | 1.71 |
| T4 | Kabuwaya          | Urban | 16600 | 5.84 | 1.5  |
| T4 | Godiya            | Rural | 30333 | 5.79 | 0.64 |
| T4 | Dambatta West     | Rural | 32011 | 5.79 | 1.5  |
| T4 | Babban Giji       | Urban | 39643 | 5.74 | 2.14 |
| T4 | Yallami           | Rural | 32776 | 5.73 | 1.5  |
| T4 | Zuga              | Rural | 26023 | 5.68 | 1.28 |
| T4 | Katumari          | Rural | 16426 | 5.60 | 0.21 |
| T4 | Sakara Tsa        | Rural | 9430  | 5.57 | 0.21 |
| T4 | Tudun Nufawa      | Urban | 33552 | 5.55 | 2.35 |
| T4 | Gwarmai-Bebeji    | Rural | 51710 | 5.40 | 1.5  |
| T4 | Lajawa            | Rural | 30135 | 5.33 | 1.5  |
| T4 | Dangora           | Rural | 21748 | 5.28 | 0.64 |
| T4 | Garun Sheme       | Rural | 8739  | 5.26 | 0.43 |
| T4 | Kau-Kau           | Rural | 25594 | 5.24 | 1.92 |
| T4 | Makoda            | Rural | 36051 | 5.15 | 0.64 |
| T4 | Magajin Hajji     | Rural | 23602 | 5.12 | 0.64 |
| T4 | Jajaye            | Rural | 35409 | 5.06 | 1.07 |
| T4 | Sanda             | Rural | 23000 | 5.06 | 0.85 |
| T4 | Koguna            | Rural | 31300 | 5.04 | 0.85 |
| T4 | Sarina            | Rural | 26202 | 5.01 | 0.43 |
| T4 | Yammata           | Urban | 34716 | 5.01 | 0.85 |
| T4 | Tarai             | Rural | 28632 | 4.99 | 1.07 |
| T4 | Rantan            | Rural | 16188 | 4.97 | 0.43 |

|    |                |       |       |      |      |
|----|----------------|-------|-------|------|------|
| T4 | Baburi         | Rural | 39019 | 4.71 | 1.07 |
| T4 | Jibga          | Rural | 47908 | 4.62 | 0.64 |
| T4 | Nata-Ala       | Rural | 43657 | 4.47 | 1.71 |
| T4 | Wangara        | Rural | 32803 | 4.34 | 1.92 |
| T4 | Babbar Ruga    | Rural | 34707 | 4.22 | 0.64 |
| T4 | Durbunde       | Rural | 34308 | 4.17 | 0.85 |
| T4 | Tamawa         | Rural | 12671 | 4.15 | 0.43 |
| T4 | Yada Kunya     | Rural | 25440 | 4.06 | 1.07 |
| T4 | Wangara-Tofa   | Rural | 9593  | 4.06 | 0.43 |
| T4 | Kantama        | Rural | 31602 | 4.05 | 0.64 |
| T4 | Dukawa         | Rural | 28412 | 4.02 | 1.5  |
| T4 | Kuka           | Rural | 22546 | 4.00 | 0.85 |
| T4 | Romo           | Rural | 26268 | 4.00 | 1.07 |
| T4 | Gurjiya-II     | Rural | 12807 | 3.97 | 0.85 |
| T4 | Kiyawa         | Rural | 30620 | 3.78 | 0.64 |
| T4 | Zarogi         | Rural | 23641 | 3.66 | 0.43 |
| T4 | Gogel          | Rural | 7495  | 3.50 | 0.43 |
| T4 | Kwanyawa       | Rural | 27754 | 3.48 | 0.64 |
| T4 | Alajawa        | Rural | 15173 | 3.46 | 0.43 |
| T4 | Yanganau       | Rural | 28795 | 3.43 | 0.64 |
| T4 | Raba           | Rural | 26802 | 3.43 | 0.64 |
| T4 | Rigar Duka     | Rural | 19089 | 3.42 | 1.07 |
| T4 | Garo           | Rural | 43276 | 3.30 | 1.07 |
| T4 | Tsaudawa       | Rural | 17191 | 3.22 | 0.64 |
| T4 | Gamarya        | Rural | 20303 | 3.19 | 0.85 |
| T4 | Chiranchi      | Urban | 63634 | 3.11 | 2.14 |
| T4 | Kwami          | Rural | 3724  | 3.08 | 0.21 |
| T4 | Gargari        | Rural | 32536 | 3.02 | 1.5  |
| T4 | Gundutse       | Rural | 17151 | 2.97 | 0.64 |
| T4 | Garun Danga    | Rural | 31341 | 2.93 | 0.64 |
| T4 | Muntsira       | Rural | 40553 | 2.91 | 1.5  |
| T4 | Shuwaki-Kunchi | Rural | 24081 | 2.88 | 0.43 |
| T4 | Maraku-Kiru    | Rural | 16707 | 2.85 | 0.64 |
| T4 | Dangada        | Rural | 18701 | 2.81 | 0.43 |
| T4 | Daddarawa      | Rural | 14007 | 2.63 | 0.43 |
| T4 | Ruwan Bago     | Rural | 56456 | 2.56 | 1.28 |
| T4 | Joda           | Rural | 31624 | 2.54 | 0.43 |
| T4 | Babawa         | Rural | 51716 | 2.53 | 1.71 |
| T4 | Kunya          | Rural | 46705 | 2.48 | 0.64 |
| T4 | Sarkin Kura    | Rural | 19914 | 2.47 | 0.64 |
| T4 | Chiromawa      | Rural | 24043 | 2.46 | 0.64 |
| T4 | Dambatta East  | Rural | 47500 | 2.37 | 0.85 |
| T4 | Dugurawa       | Rural | 5580  | 2.35 | 0.21 |
| T4 | Ajumawa        | Rural | 28034 | 2.34 | 0.43 |
| T4 | Saye           | Rural | 22125 | 2.15 | 0.85 |
| T4 | Wasai          | Rural | 30178 | 2.08 | 0.64 |
| T4 | Doka Dawa      | Rural | 12920 | 2.03 | 0.43 |
| T4 | San San        | Rural | 19029 | 2.00 | 0.43 |
| T4 | Fagge D1       | Urban | 5981  | 1.99 | 0.21 |
| T4 | Falali         | Rural | 25657 | 1.98 | 0.85 |

|    |                  |       |       |      |      |
|----|------------------|-------|-------|------|------|
| T4 | Shere            | Rural | 20152 | 1.96 | 0.43 |
| T4 | Dan Hassan       | Rural | 31836 | 1.91 | 0.85 |
| T4 | Sabon Gari East  | Urban | 39356 | 1.84 | 0.64 |
| T4 | Fajewa           | Rural | 21549 | 1.83 | 0.64 |
| T4 | Kurugu           | Rural | 21147 | 1.80 | 0.64 |
| T4 | Unguwar Gano     | Urban | 16183 | 1.79 | 0.43 |
| T4 | Shakogi          | Rural | 22562 | 1.77 | 0.64 |
| T4 | Jemagu           | Rural | 7451  | 1.76 | 0.21 |
| T4 | Falgore Rogo     | Rural | 34411 | 1.73 | 0.21 |
| T4 | Karofin Yashi    | Rural | 14574 | 1.69 | 0.43 |
| T4 | Kureken Sani     | Rural | 24439 | 1.69 | 0.64 |
| T4 | Gamoji           | Rural | 14666 | 1.68 | 0.43 |
| T4 | Yautar Kudu      | Rural | 39144 | 1.60 | 0.64 |
| T4 | Yola             | Rural | 15463 | 1.59 | 0.43 |
| T4 | Baawa            | Rural | 37046 | 1.55 | 0.85 |
| T4 | Zakarawa         | Rural | 18207 | 1.44 | 0.43 |
| T4 | Yakun            | Rural | 9345  | 1.41 | 0.21 |
| T4 | Durmawa          | Rural | 18862 | 1.39 | 0.21 |
| T4 | Gala             | Rural | 29479 | 1.34 | 0.43 |
| T4 | Karo             | Rural | 11129 | 1.18 | 0.21 |
| T4 | Jigawa           | Rural | 22985 | 1.16 | 0.43 |
| T4 | Masu             | Rural | 45507 | 1.15 | 0.43 |
| T4 | Unguwar Duniya   | Rural | 11429 | 1.15 | 0.21 |
| T4 | Wailare          | Rural | 23158 | 1.13 | 0.43 |
| T4 | Tattarawa        | Rural | 22547 | 1.13 | 0.43 |
| T4 | Chalawa          | Rural | 12884 | 1.13 | 0.21 |
| T4 | Kibiya 2         | Rural | 11363 | 1.12 | 0.21 |
| T4 | Tsamiya Babba    | Rural | 60305 | 1.11 | 0.85 |
| T4 | Bagwaro          | Rural | 24433 | 1.07 | 0.43 |
| T4 | Marke            | Rural | 34959 | 1.02 | 0.64 |
| T4 | Gediya           | Rural | 39586 | 1.00 | 0.64 |
| T4 | Hawaden Galadima | Rural | 12466 | 0.99 | 0.21 |
| T4 | Dogon Nama       | Urban | 40635 | 0.98 | 0.64 |
| T4 | Balan            | Rural | 26642 | 0.95 | 0.21 |
| T4 | Dugabau          | Rural | 28064 | 0.94 | 0.43 |
| T4 | Gwarabjawa       | Rural | 46165 | 0.93 | 0.43 |
| T4 | Wak              | Rural | 12331 | 0.93 | 0.21 |
| T4 | Wuro Bagga       | Rural | 28044 | 0.91 | 0.43 |
| T4 | Ganduje          | Rural | 16053 | 0.90 | 0.21 |
| T4 | Faruruwa         | Rural | 15059 | 0.90 | 0.21 |
| T4 | Azore            | Rural | 28478 | 0.83 | 0.21 |
| T4 | Gargai           | Rural | 14177 | 0.81 | 0.21 |
| T4 | Dashi            | Rural | 16334 | 0.80 | 0.21 |
| T4 | Dunbulum         | Rural | 18525 | 0.78 | 0.21 |
| T4 | Bataiya          | Rural | 33718 | 0.78 | 0.43 |
| T4 | Masanawa         | Rural | 15791 | 0.78 | 0.21 |
| T4 | Chula            | Rural | 16919 | 0.78 | 0.21 |
| T4 | Galadimawa       | Rural | 17352 | 0.76 | 0.21 |
| T4 | Toranke          | Rural | 52242 | 0.75 | 0.43 |
| T4 | Badafi           | Rural | 36855 | 0.71 | 0.43 |

|    |                  |       |       |      |      |
|----|------------------|-------|-------|------|------|
| T4 | Garun Babba      | Rural | 19425 | 0.70 | 0.21 |
| T4 | Tariwa           | Rural | 17349 | 0.66 | 0.21 |
| T4 | Gyadi Gyadi Kudu | Urban | 20081 | 0.65 | 0.21 |
| T4 | Tangaji          | Rural | 20975 | 0.63 | 0.21 |
| T4 | Dundun           | Rural | 21302 | 0.62 | 0.21 |
| T4 | Durun            | Rural | 21579 | 0.61 | 0.21 |
| T4 | Kofa             | Rural | 18876 | 0.61 | 0.21 |
| T4 | Garin Ali        | Rural | 21853 | 0.60 | 0.21 |
| T4 | Makwaro          | Rural | 25221 | 0.58 | 0.21 |
| T4 | Kanwa            | Rural | 23119 | 0.57 | 0.21 |
| T4 | Tabo             | Rural | 23680 | 0.55 | 0.21 |
| T4 | Yandadi          | Rural | 24158 | 0.54 | 0.21 |
| T4 | Tatsan           | Rural | 28379 | 0.53 | 0.21 |
| T4 | Kadan Dani       | Rural | 49980 | 0.53 | 0.21 |
| T4 | Ranka            | Rural | 22144 | 0.52 | 0.21 |
| T4 | Hungu            | Rural | 22528 | 0.51 | 0.21 |
| T4 | Gandurwawa       | Rural | 24932 | 0.49 | 0.21 |
| T4 | Dabar Kwari      | Rural | 28440 | 0.46 | 0.21 |
| T4 | Kwa              | Rural | 25755 | 0.46 | 0.21 |
| T4 | Gogori           | Rural | 25295 | 0.45 | 0.21 |
| T4 | Gurun            | Rural | 30625 | 0.43 | 0.21 |
| T4 | Kwarkiya         | Rural | 30110 | 0.41 | 0.21 |
| T4 | Dutsen Bakoshi   | Rural | 34245 | 0.37 | 0.21 |
| T4 | Tsakuwa-Minjibir | Rural | 35157 | 0.35 | 0.21 |
| T4 | Kachako          | Rural | 49083 | 0.27 | 0.21 |
| T4 | Anadariya        | Rural | 9164  | 0.00 | 0    |
| T4 | Baguda           | Rural | 13766 | 0.00 | 0    |
| T4 | Bono             | Rural | 24015 | 0.00 | 0    |
| T4 | Bumai            | Rural | 13945 | 0.00 | 0    |
| T4 | Damau            | Rural | 15128 | 0.00 | 0    |
| T4 | Dansoshiya       | Rural | 17467 | 0.00 | 0    |
| T4 | Dorawar Sallau   | Rural | 14148 | 0.00 | 0    |
| T4 | Durma            | Rural | 16360 | 0.00 | 0    |
| T4 | Fagge C          | Urban | 10015 | 0.00 | 0    |
| T4 | Fagolo           | Rural | 23647 | 0.00 | 0    |
| T4 | Fankurun         | Rural | 9004  | 0.00 | 0    |
| T4 | Gagarame         | Rural | 39982 | 0.00 | 0    |
| T4 | Galinja          | Rural | 7031  | 0.00 | 0    |
| T4 | Garfa            | Rural | 23711 | 0.00 | 0    |
| T4 | Goron-Dutse      | Rural | 19404 | 0.00 | 0    |
| T4 | Gozarki          | Rural | 13289 | 0.00 | 0    |
| T4 | Gude             | Rural | 19450 | 0.00 | 0    |
| T4 | Gurduba          | Rural | 23870 | 0.00 | 0    |
| T4 | Gwanda           | Rural | 28518 | 0.00 | 0    |
| T4 | Gwarmai-Kunchi   | Rural | 19109 | 0.00 | 0    |
| T4 | Juma Galadima    | Rural | 19989 | 0.00 | 0    |
| T4 | Kabagiwa         | Rural | 28427 | 0.00 | 0    |
| T4 | Kadamu           | Rural | 18850 | 0.00 | 0    |
| T4 | Kanawa           | Rural | 24017 | 0.00 | 0    |
| T4 | Kanwa-Kabo       | Rural | 15512 | 0.00 | 0    |

|                 |                  |       |                  |      |   |
|-----------------|------------------|-------|------------------|------|---|
| T4              | Karmami          | Rural | 35292            | 0.00 | 0 |
| T4              | Kasuwar Kuka     | Rural | 24469            | 0.00 | 0 |
| T4              | Kokiya           | Rural | 16483            | 0.00 | 0 |
| T4              | Kore             | Rural | 30057            | 0.00 | 0 |
| T4              | Kuru             | Rural | 32755            | 0.00 | 0 |
| T4              | Kurun Sumau      | Rural | 20590            | 0.00 | 0 |
| T4              | Leni             | Rural | 9277             | 0.00 | 0 |
| T4              | Madari           | Rural | 14706            | 0.00 | 0 |
| T4              | Maimakawa        | Rural | 36008            | 0.00 | 0 |
| T4              | Maitsidau        | Rural | 30289            | 0.00 | 0 |
| T4              | Matan Fada       | Rural | 19367            | 0.00 | 0 |
| T4              | Ridawa           | Rural | 7590             | 0.00 | 0 |
| T4              | Sarbi            | Rural | 14062            | 0.00 | 0 |
| T4              | Satame           | Rural | 24776            | 0.00 | 0 |
| T4              | Tamburawan Gabas | Rural | 13850            | 0.00 | 0 |
| T4              | Tanawa           | Urban | 9808             | 0.00 | 0 |
| T4              | Tarauni-Gabasawa | Rural | 15539            | 0.00 | 0 |
| T4              | Tsakiya          | Rural | 20519            | 0.00 | 0 |
| T4              | Tsangaya         | Rural | 30886            | 0.00 | 0 |
| T4              | Unguwar Bai      | Rural | 23941            | 0.00 | 0 |
| T4              | Unguwar Rimi     | Rural | 16526            | 0.00 | 0 |
| T4              | Yangizo          | Rural | 10682            | 0.00 | 0 |
| T4              | Yautar Arewa     | Rural | 20706            | 0.00 | 0 |
| T4              | Yumbu            | Rural | 17721            | 0.00 | 0 |
| T4              | Zakirai          | Rural | 24873            | 0.00 | 0 |
| T4              | Zugachi          | Rural | 26122            | 0.00 | 0 |
| <b>T4 Total</b> | <b>241</b>       |       | <b>5,811,246</b> |      |   |

\*Note: Table is arranged in descending order of mean annual incidence within the micro-hotspots types (T). The ward population reflects the year 2019 estimates. Out the 484 wards in Kano State, GTFCC method classified 115, 105, 23, and 241 as T1, T2, T3, and T4, respectively.
